# Supplementary material for: Age-related sarcoma patient experience: results from a national survey in England
Source: Springer Nature journal article supplement (doi:10.1186/s12885-018-4866-8), 2018-10-17
Supplement: MOESM1 [file 16206812]

| Supplementary Material: DIAGNOSIS                   |               |              |                     |         |            |                   |                |         |             |                    |               |         |
|-----------------------------------------------------|---------------|--------------|---------------------|---------|------------|-------------------|----------------|---------|-------------|--------------------|---------------|---------|
|                                                     | TOTAL (n=558) | BONE (n=140) | SOFT TISSUE (n=418) | p-value | AYA (n=23) | Middle-age (n=78) | Elderly (n=39) | p-value | AYA (16-34) | Middle-age (35-64) | Elderly (>65) | p-value |
| <b>Presenting Symptoms</b>                          |               |              |                     |         |            |                   |                |         |             |                    |               |         |
| Painless lump                                       | 229 (41.0%)   | 39 (27.9%)   | 190 (45.5%)         | <0.001  | 4 (17.4%)  | 22 (28.2%)        | 13 (33.3%)     | 0.398   | 5 (21.7%)   | 92 (44.4%)         | 93 (49.5%)    | 0.038   |
| Painful Lump                                        | 81 (14.5%)    | 21 (15.0%)   | 60 (14.4%)          | 0.851   | 6 (26.1%)  | 13 (16.7%)        | 2 (5.1%)       | 0.068   | 5 (21.7%)   | 32 (15.5%)         | 23 (12.2%)    | 0.384   |
| Lump increasing in size                             | 166 (29.7%)   | 30 (21.4%)   | 136 (32.5%)         | 0.013   | 3 (13.0%)  | 18 (23.1%)        | 9 (23.1%)      | 0.563   | 7 (30.4%)   | 62 (30%)           | 67 (35.6%)    | 0.472   |
| New lump where lump previously removed              | 34 (6.1%)     | 8 (5.7%)     | 26 (6.2%)           | 0.829   | 0 (0.0%)   | 5 (6.4%)          | 3 (7.7%)       | 0.417   | 1 (4.3%)    | 16 (7.7%)          | 9 (4.8%)      | 0.447   |
| Bone pain                                           | 56 (10.0%)    | 44 (31.4%)   | 12 (2.9%)           | <0.001  | 13 (56.5%) | 23 (29.5%)        | 8 (20.5%)      | 0.011   | 1 (4.3%)    | 7 (3.4%)           | 4 (2.1%)      | 0.689   |
| Something else                                      | 173 (31.0%)   | 36 (25.7%)   | 137 (32.8%)         | 0.118   | 4 (11.1%)  | 24 (66.7%)        | 8 (20.5%)      | 0.297   | 10 (43.5%)  | 70 (33.8%)         | 57 (30.3%)    | 0.404   |
| <b>Time to Presentation</b>                         |               |              |                     |         |            |                   |                |         |             |                    |               |         |
| <2 weeks                                            | 140 (25.8%)   | 26 (19.4%)   | 114 (27.9%)         |         | 6 (27.3%)  | 13 (17.6%)        | 7 (18.4%)      |         | 7 (30.4%)   | 60 (30.0%)         | 47 (25.4%)    |         |
| >2 weeks <4 weeks                                   | 111 (20.5%)   | 23 (17.2%)   | 88 (21.6%)          |         | 6 (27.3%)  | 8 (10.8%)         | 9 (23.7%)      |         | 9 (39.1%)   | 35 (17.5%)         | 44 (23.8%)    |         |
| >4 weeks <3 months                                  | 117 (21.6%)   | 33 (24.6%)   | 84 (20.6%)          |         | 3 (13.6%)  | 21 (28.4%)        | 9 (23.7%)      |         | 1 (4.3%)    | 42 (21%)           | 41 (22.2%)    |         |
| >3 months <6 months                                 | 54 (10.0%)    | 13 (9.7%)    | 41 (10.0%)          |         | 4 (18.2%)  | 6 (8.1%)          | 3 (7.9%)       |         | 2 (8.7%)    | 22 (11%)           | 17 (9.2%)     |         |
| >6 months <1 year                                   | 42 (7.7%)     | 9 (6.7%)     | 33 (8.1%)           |         | 2 (9.1%)   | 7 (9.5%)          | 0 (0.0%)       |         | 3 (13.0%)   | 14 (7%)            | 16 (8.6%)     |         |
| > 1 year                                            | 54 (10.0%)    | 21 (15.7%)   | 33 (8.1%)           |         | 1 (4.5%)   | 15 (20.3%)        | 5 (13.2%)      |         | 0 (0%)      | 19 (9.5%)          | 14 (7.6%)     |         |
| Unsure                                              | 24 (4.4%)     | 9 (6.7%)     | 15 (3.7%)           |         | 0 (0.0%)   | 4 (5.4%)          | 5 (13.2%)      |         | 1 (4.3%)    | 8 (4%)             | 6 (3.2%)      |         |
|                                                     |               |              |                     | 0.047   |            |                   |                | 0.094   |             |                    |               | 0.353   |
| <b>GP Action*</b>                                   |               |              |                     |         |            |                   |                |         |             |                    |               |         |
| Referred for tests                                  | 153 (31.2%)   | 39 (31.2%)   | 114 (31.1%)         |         | 6 (27.3%)  | 23 (31.9%)        | 10 (32.3%)     |         | 6 (33.3%)   | 61 (33.0%)         | 47 (28.8%)    |         |
| Referred to specialist                              | 148 (20.1%)   | 33 (26.4%)   | 115 (31.4%)         |         | 4 (18.2%)  | 19 (26.4%)        | 10 (32.3%)     |         | 0 (0.0%)    | 48 (25.9%)         | 67 (41.1%)    |         |
| Sent to hospital same day                           | 23 (4.7%)     | 3 (2.4%)     | 20 (5.5%)           |         | 0 (0.0%)   | 2 (2.8%)          | 1 (3.2%)       |         | 1 (5.6%)    | 10 (5.4%)          | 9 (5.5%)      |         |
| Treated for another condition                       | 42 (8.6%)     | 10 (8.0%)    | 32 (8.7%)           |         | 1 (4.5%)   | 7 (9.7%)          | 2 (6.5%)       |         | 3 (16.7%)   | 19 (10.3%)         | 10 (6.1%)     |         |
| Told not serious, not told to come back             | 40 (8.1%)     | 9 (7.2%)     | 31 (8.5%)           |         | 4 (18.2%)  | 4 (5.6%)          | 1 (3.2%)       |         | 0 (0.0%)    | 17 (9.2%)          | 14 (8.6%)     |         |
| Told not serious but told to come back if continued | 41 (8.4%)     | 10 (8.0%)    | 31 (8.5%)           |         | 5 (22.7%)  | 5 (6.9%)          | 0 (0.0%)       |         | 5 (27.8%)   | 16 (8.6%)          | 10 (6.1%)     |         |
| Didn't go to GP                                     | 44 (9.0%)     | 21 (16.8%)   | 23 (6.3%)           |         | 2 (9.1%)   | 12 (16.7%)        | 7 (22.6%)      |         | 3 (16.7%)   | 14 (7.6%)          | 6 (3.7%)      |         |
|                                                     |               |              |                     | 0.025   |            |                   |                | 0.149   |             |                    |               | 0.001   |
| Referred for tests/specialist/hospital              | 324 (72%)     | 75 (72.1%)   | 249 (72.5%)         |         | 10 (50%)   | 44 (73.3%)        | 21 (87.5%)     |         | 7 (46.7%)   | 119 (69.6%)        | 123 (78.3%)   |         |
| Treated for another condition/told not serious      | 123 (28%)     | 29 (27.9%)   | 94 (27.4%)          |         | 10 (50%)   | 16 (26.7%)        | 3 (12.5%)      |         | 8 (53.3%)   | 52 (30.4%)         | 34 (21.7%)    |         |
|                                                     |               |              |                     | 0.924   |            |                   |                | 0.021   |             |                    |               | 0.015   |
| <b>Emergency Department (ED) Action*</b>            |               |              |                     |         |            |                   |                |         |             |                    |               |         |
| Referred for tests                                  | 62 (13.2%)    | 19 (16.0%)   | 43 (12.3%)          |         | 6 (28.6%)  | 7 (10.6%)         | 6 (18.8%)      |         | 6 (26.1%)   | 12 (7.0%)          | 25 (16.0%)    |         |
| Referred to specialist                              | 29 (6.2%)     | 5 (4.2%)     | 24 (6.9%)           |         | 0 (0.0%)   | 5 (7.6%)          | 0 (0.0%)       |         | 1 (4.3%)    | 10 (5.8%)          | 13 (8.3%)     |         |
| Treated for another condition                       | 12 (2.6%)     | 1 (0.8%)     | 11 (3.1%)           |         | 0 (0.0%)   | 1 (1.5%)          | 0 (0.0%)       |         | 1 (4.3%)    | 8 (4.7%)           | 2 (1.3%)      |         |
| Told not serious, not told to come back             | 13 (2.8%)     | 5 (4.2%)     | 8 (2.3%)            |         | 0 (0.0%)   | 2 (3.0%)          | 3 (9.4%)       |         | 3 (13.0%)   | 4 (2.3%)           | 1 (0.6%)      |         |
| Told not serious but told to come back if continued | 5 (1.1%)      | 2 (1.7%)     | 3 (0.9%)            |         | 2 (9.5%)   | 0 (0.0%)          | 0 (0.0%)       |         | 1 (4.3%)    | 0                  | 2 (1.3%)      |         |
| Didn't go to ED                                     | 348 (74.2%)   | 87 (73.1%)   | 261 (74.6%)         |         | 13 (61.9%) | 51 (77.3%)        | 23 (71.9%)     |         | 11 (47.8%)  | 137 (80.1%)        | 113 (72.4%)   |         |
|                                                     |               |              |                     | 0.355   |            |                   |                | 0.019   |             |                    |               | <0.001  |
| Referred for tests/specialist/hospital              | 91 (75%)      | 24 (75.0%)   | 67 (75.3%)          |         | 6 (75%)    | 12 (80%)          | 6 (66.7%)      |         | 7 (58.3%)   | 22 (64.7%)         | 38 (88.4%)    |         |
| Treated for another condition/told not serious      | 30 (25%)      | 8 (25.0%)    | 22 (24.7%)          |         | 2 (25%)    | 3 (20%)           | 3 (33.3%)      |         | 5 (41.7%)   | 12 (35.3%)         | 5 (11.6%)     |         |
|                                                     |               |              |                     | 0.975   |            |                   |                | 0.766   |             |                    |               | 0.02    |
| <b>Told Sarcoma was possible diagnosis*</b>         |               |              |                     |         |            |                   |                |         |             |                    |               |         |
| Yes                                                 | 104 (19.4%)   | 27 (21.6%)   | 77 (19.3%)          |         | 2 (9.1%)   | 10 (14.3%)        | 15 (45.5%)     |         | 4 (17.4%)   | 24 (12.1%)         | 49 (27.7%)    |         |
| No                                                  | 420 (78.5%)   | 98 (78.4%)   | 322 (80.7%)         |         | 20 (90.9%) | 60 (85.7%)        | 18 (54.5%)     |         | 19 (82.6%)  | 175 (87.9%)        | 128 (72.3%)   |         |
|                                                     |               |              |                     | 0.573   |            |                   |                | <0.001  |             |                    |               | 0.001   |

\*Patient's perception - GP/ED perspective not surveyed.
