# Supplementary material for: Age-related sarcoma patient experience: results from a national survey in England
Source: Springer Nature journal article supplement (doi:10.1186/s12885-018-4866-8), 2018-10-17
Supplement: MOESM2 [file 16206812]

| SUPPLEMENTARY MATERIAL: TREATMENT                                 |               |              |                     |         |            |                   |                |         |            |                    |                 |         |
|-------------------------------------------------------------------|---------------|--------------|---------------------|---------|------------|-------------------|----------------|---------|------------|--------------------|-----------------|---------|
|                                                                   | TOTAL (n=558) | BONE (n=140) | SOFT TISSUE (n=418) | p-value | AYA (n=23) | Middle-age (n=78) | Elderly (n=39) | p-value | AYA (n=23) | Middle-age (n=207) | Elderly (n=188) | p-value |
| <b>Treated by a specialist sarcoma team</b>                       |               |              |                     |         |            |                   |                |         |            |                    |                 |         |
| Yes                                                               | 475 (87.2%)   | 122 (87.8%)  | 353 (86.9%)         |         | 19 (82.6%) | 67 (87.0%)        | 36 (92.3%)     |         | 19 (82.6%) | 167 (83.1%)        | 167 (91.8%)     |         |
| No                                                                | 55 (10.1%)    | 12 (8.6%)    | 43 (10.6%)          |         | 2 (8.7%)   | 8 (10.4%)         | 2 (5.1%)       |         | 3 (13.0%)  | 30 (14.9%)         | 10 (5.5%)       |         |
| Don't know                                                        | 15 (2.8%)     | 5 (3.6%)     | 10 (2.5%)           | 0.642   | 2 (8.7%)   | 2 (2.6%)          | 1 (2.6%)       | 0.560   | 1 (4.3%)   | 4 (2.0%)           | 5 (2.7%)        | 0.047   |
| <b>No hospitals attended for treatment</b>                        |               |              |                     |         |            |                   |                |         |            |                    |                 |         |
| 1                                                                 | 185 (33.6%)   | 53 (38.4%)   | 132 (32.0%)         |         | 4 (17.4%)  | 28 (36.8%)        | 21 (53.8%)     |         | 10 (43.5%) | 56 (27.6%)         | 66 (35.5%)      |         |
| 2                                                                 | 249 (45.3%)   | 56 (40.6%)   | 193 (46.8%)         |         | 9 (39.1%)  | 35 (46.1%)        | 12 (30.8%)     |         | 9 (39.1%)  | 100 (49.3%)        | 84 (45.2%)      |         |
| 3                                                                 | 84 (15.3%)    | 16 (11.6%)   | 68 (16.5%)          |         | 5 (21.7%)  | 7 (9.2%)          | 4 (10.3%)      |         | 4 (17.4%)  | 32 (15.4%)         | 32 (17.2%)      |         |
| >3                                                                | 32 (5.8%)     | 13 (9.4%)    | 19 (4.6%)           | 0.048   | 5 (21.7%)  | 6 (7.9%)          | 2 (5.1%)       | 0.033   | 0 (0.0%)   | 15 (7.4%)          | 4 (2.2%)        | 0.102   |
| <b>Distance travelled for surgery</b>                             |               |              |                     |         |            |                   |                |         |            |                    |                 |         |
| <5 miles                                                          | 58 (11.7%)    | 9 (7.0%)     | 49 (13.4%)          |         | 1 (5.0%)   | 5 (6.8%)          | 3 (8.6%)       |         | 4 (21.1%)  | 23 (12.6%)         | 22 (13.3%)      |         |
| 5-10 miles                                                        | 66 (13.4%)    | 15 (11.7%)   | 51 (13.9%)          |         | 1 (5.0%)   | 8 (11.0%)         | 6 (17.1%)      |         | 1 (5.3%)   | 32 (17.6%)         | 18 (10.9%)      |         |
| 10-20 miles                                                       | 110 (22.3%)   | 22 (17.2%)   | 88 (24.0%)          |         | 2 (10.0%)  | 12 (16.4%)        | 8 (22.9%)      |         | 6 (31.6%)  | 42 (23.1%)         | 40 (24.2%)      |         |
| 20-50 miles                                                       | 142 (28.7%)   | 36 (28.1%)   | 106 (29.0%)         |         | 7 (35.0%)  | 22 (30.1%)        | 7 (20.0%)      |         | 4 (21.1%)  | 50 (27.3%)         | 52 (31.5%)      |         |
| >50 miles                                                         | 118 (23.9%)   | 46 (35.9%)   | 72 (19.7%)          | 0.003   | 9 (45.0%)  | 26 (35.6%)        | 11 (31.4%)     | 0.744   | 4 (21.1%)  | 35 (19.2%)         | 33 (20.0%)      | 0.620   |
| <b>Did not mind travelling for surgery</b>                        |               |              |                     |         |            |                   |                |         |            |                    |                 |         |
| Yes                                                               | 451 (88.8%)   | 118 (88.7%)  | 333 (88.8%)         | 0.980   | 17 (89.5%) | 66 (86.8%)        | 35 (92.1%)     | 0.700   | 19 (95%)   | 165 (88.2%)        | 149 (88.7%)     | 0.659   |
| <b>Chemo/radiotherapy given in different hospital to surgery.</b> |               |              |                     |         |            |                   |                |         |            |                    |                 |         |
| Yes                                                               | 209 (61.8%)   | 53 (65.4%)   | 156 (60.7%)         | 0.445   | 17 (89.5%) | 30 (65.2%)        | 6 (37.5%)      | <0.001  | 11 (64.7%) | 85 (62.5%)         | 60 (57.7%)      | 0.707   |
| <b>Offered in clinical trial</b>                                  |               |              |                     |         |            |                   |                |         |            |                    |                 |         |
| Yes                                                               | 158 (29.9%)   | 39 (29.3%)   | 119 (30.1%)         |         | 14 (60.9%) | 17 (23.0%)        | 8 (22.2%)      |         | 6 (27.3%)  | 66 (33.2%)         | 47 (26.9%)      |         |
| No                                                                | 324 (61.2%)   | 86 (64.7%)   | 238 (60.1%)         |         | 9 (39.1%)  | 51 (68.9%)        | 26 (72.2%)     |         | 13 (59.1%) | 112 (56.3%)        | 113 (64.6%)     |         |
| Can't remember                                                    | 47 (8.9%)     | 8 (6.0%)     | 39 (9.8%)           | 0.367   | 0 (0%)     | 6 (8.1%)          | 2 (5.6%)       | 0.007   | 3 (13.6%)  | 21 (10.6%)         | 15 (8.6%)       | 0.546   |
| <b>Took part in clinical trial</b>                                |               |              |                     |         |            |                   |                |         |            |                    |                 |         |
| Yes                                                               | 116 (22.2%)   | 33 (25.0%)   | 83 (21.3%)          | 0.374   | 12 (52.2%) | 13 (18.3%)        | 8 (21.1%)      | 0.004   | 4 (19.0%)  | 46 (24%)           | 33 (18.6%)      | 0.445   |
| <b>Clinical nurse specialist</b>                                  |               |              |                     |         |            |                   |                |         |            |                    |                 |         |
| Yes, same                                                         | 338 (63.4%)   | 83 (62.9%)   | 255 (63.6%)         |         | 17 (77.3%) | 40 (54.1%)        | 26 (72.2%)     |         | 14 (63.6%) | 116 (58.3%)        | 125 (69.4%)     |         |
| Sometimes                                                         | 68 (12.8%)    | 21 (15.9%)   | 47 (11.7%)          |         | 1 (4.5%)   | 15 (20.3%)        | 5 (13.9%)      |         | 3 (13.6%)  | 28 (14.1%)         | 16 (8.9%)       |         |
| No                                                                | 79 (14.8%)    | 18 (13.6%)   | 61 (15.2%)          |         | 3 (13.6%)  | 10 (13.5%)        | 5 (13.9%)      |         | 2 (9.1%)   | 36 (18.1%)         | 23 (12.8%)      |         |
| Don't know                                                        | 48 (9.0%)     | 10 (7.6%)    | 38 (9.5%)           | 0.585   | 1 (4.5%)   | 9 (12.2%)         | 0 (0.0%)       | 0.127   | 3 (13.6%)  | 19 (9.5%)          | 16 (8.9%)       | 0.344   |
| <b>Sufficient information to make decisions on care</b>           |               |              |                     |         |            |                   |                |         |            |                    |                 |         |
| Yes, all                                                          | 472 (86.6%)   | 116 (84.1%)  | 356 (87.5%)         |         | 19 (82.6%) | 60 (77.9%)        | 37 (97.4%)     |         | 19 (86.4%) | 166 (82.6%)        | 171 (92.9%)     |         |
| Only some                                                         | 63 (11.6%)    | 19 (13.8%)   | 44 (10.8%)          |         | 1 (4.3%)   | 17 (22.1%)        | 1 (2.6%)       |         | 3 (13.6%)  | 30 (14.9%)         | 11 (6.0%)       |         |
| No                                                                | 6 (1.1%)      | 1 (0.7%)     | 5 (1.2%)            |         | 1 (4.3%)   | 0 (0%)            | 0 (0%)         |         | 0 (0%)     | 4 (2.0%)           | 1 (0.5%)        |         |
| Did not want to be involved                                       | 4 (0.7%)      | 2 (1.4%)     | 2 (0.5%)            | 0.485   | 2 (8.7%)   | 0 (0%)            | 0 (0%)         | <0.001  | 0 (0%)     | 1 (0.5%)           | 1 (0.5%)        | 0.105   |
| <b>Given a written treatment plan</b>                             |               |              |                     |         |            |                   |                |         |            |                    |                 |         |
| Yes                                                               | 300 (61.3%)   | 81 (64.3%)   | 219 (60.3%)         | 0.432   | 16 (69.6%) | 40 (58.8%)        | 25 (71.4%)     | 0.379   | 12 (54.5%) | 101 (57.7%)        | 106 (63.9%)     | 0.434   |
| <b>Given enough emotional support</b>                             |               |              |                     |         |            |                   |                |         |            |                    |                 |         |
| Yes, definitely                                                   | 308 (56.5%)   | 84 (60.9%)   | 224 (55.0%)         |         | 12 (52.2%) | 39 (51.3%)        | 33 (84.6%)     |         | 9 (40.9%)  | 100 (48.8%)        | 115 (63.9%)     |         |
| Yes, to some extent                                               | 133 (24.4%)   | 32 (23.2%)   | 101 (24.8%)         |         | 8 (34.8%)  | 21 (27.6%)        | 3 (7.7%)       |         | 10 (45.5%) | 55 (26.8%)         | 36 (20.0%)      |         |
| No, would have liked more                                         | 40 (7.3%)     | 11 (8.0%)    | 29 (7.1%)           |         | 3 (13.0%)  | 8 (10.5%)         | 0 (0%)         |         | 3 (13.6%)  | 19 (9.3%)          | 7 (3.9%)        |         |
| Did not need                                                      | 64 (11.7%)    | 11 (8.0%)    | 53 (13.0%)          | 0.381   | 0 (0%)     | 8 (10.5%)         | 3 (7.7%)       | 0.006   | 0 (0%)     | 31 (15.1%)         | 22 (12.2%)      | 0.003   |

| Supplementary Material: TREATMENT  |                    |              |                     |                  |            |                   |                |                  |            |                    |                     |                  |
|------------------------------------|--------------------|--------------|---------------------|------------------|------------|-------------------|----------------|------------------|------------|--------------------|---------------------|------------------|
|                                    |                    |              |                     |                  |            | BONE (n=140)      |                |                  |            |                    | SOFT TISSUE (n=418) |                  |
|                                    | TOTAL (n=558)      | BONE (n=140) | SOFT TISSUE (n=418) | p-value          | AYA (n=23) | Middle-age (n=78) | Elderly (n=39) | p-value          | AYA (n=23) | Middle-age (n=207) | Elderly (n=188)     | p-value          |
| Symptoms/side-effects of treatment |                    |              |                     |                  |            |                   |                |                  |            |                    |                     |                  |
| Pain                               | <b>248 (44.4%)</b> | 77 (55.0%)   | 171 (40.9%)         | <b>0.004</b>     | 16 (69.6%) | 49 (62.8%)        | 12 (30.8%)     | <b>0.001</b>     | 16 (69.6%) | 107 (51.7%)        | 48 (25.5%)          | <b>&lt;0.001</b> |
| Nausea/vomiting                    | <b>154 (27.6%)</b> | 49 (35.0%)   | 105 (25.1%)         | <b>0.024</b>     | 17 (73.9%) | 30 (38.5%)        | 2 (5.1%)       | <b>&lt;0.001</b> | 14 (60.9%) | 64 (30.9%)         | 27 (14.4%)          | <b>&lt;0.001</b> |
| Diarrhoea                          | <b>109 (19.5%)</b> | 34 (24.3%)   | 75 (17.9%)          | 0.101            | 12 (52.2%) | 19 (24.4%)        | 3 (7.7%)       | <b>&lt;0.001</b> | 4 (17.4%)  | 49 (23.7%)         | 22 (11.7%)          | <b>0.008</b>     |
| Constipation                       | <b>171 (30.6%)</b> | 55 (39.3%)   | 116 (27.8%)         | <b>0.01</b>      | 17 (73.9%) | 32 (41.0%)        | 6 (15.4%)      | <b>&lt;0.001</b> | 12 (52.2%) | 63 (30.4%)         | 41 (21.8%)          | <b>0.004</b>     |
| Skin/nail/hair changes             | <b>238 (42.7%)</b> | 64 (45.7%)   | 174 (41.6%)         | 0.397            | 19 (82.6%) | 36 (46.2%)        | 9 (23.1%)      | <b>&lt;0.001</b> | 16 (69.6%) | 96 (46.4%)         | 62 (33.0%)          | <b>0.001</b>     |
| Sore/dry mouth                     | <b>182 (32.6%)</b> | 69 (49.3%)   | 113 (27.0%)         | <b>&lt;0.001</b> | 16 (69.6%) | 38 (48.7%)        | 15 (38.5%)     | 0.06             | 12 (52.2%) | 61 (29.5%)         | 40 (21.3%)          | <b>0.004</b>     |
| Tingling in fingers                | <b>133 (23.8%)</b> | 33 (23.6%)   | 100 (23.9%)         | 0.933            | 9 (39.1%)  | 19 (24.4%)        | 5 (12.8%)      | 0.06             | 7 (30.4%)  | 55 (26.6%)         | 38 (20.2%)          | 0.252            |
| Loss of nerve sensations/feeling   | <b>217 (38.9%)</b> | 63 (45.0%)   | 154 (36.8%)         | 0.087            | 8 (34.8%)  | 43 (55.1%)        | 12 (30.8%)     | <b>0.025</b>     | 10 (43.5%) | 94 (45.4%)         | 50 (26.6%)          | <b>&lt;0.001</b> |
| Loss of appetite                   | <b>149 (26.7%)</b> | 49 (35.0%)   | 100 (23.9%)         | <b>0.01</b>      | 16 (69.6%) | 29 (37.2%)        | 4 (10.3%)      | <b>&lt;0.001</b> | 13 (56.5%) | 52 (25.1%)         | 35 (18.6%)          | <b>&lt;0.001</b> |
| Changes to sense of smell/taste    | <b>124 (22.2%)</b> | 43 (30.7%)   | 81 (19.4%)          | <b>0.005</b>     | 13 (56.5%) | 25 (32.1%)        | 5 (12.8%)      | <b>0.001</b>     | 11 (47.8%) | 49 (23.7%)         | 21 (11.2%)          | <b>&lt;0.001</b> |
| Difficulty concentrating           | <b>116 (20.8%)</b> | 38 (27.1%)   | 78 (18.7%)          | <b>0.032</b>     | 12 (52.2%) | 19 (24.4%)        | 7 (17.9%)      | <b>0.01</b>      | 12 (52.2%) | 42 (20.3%)         | 24 (12.8%)          | <b>&lt;0.001</b> |
| Difficulty getting to sleep        | <b>162 (29.0%)</b> | 50 (35.7%)   | 112 (26.8%)         | <b>0.044</b>     | 15 (65.2%) | 27 (34.6%)        | 8 (20.5%)      | <b>0.002</b>     | 13 (56.5%) | 60 (29.0%)         | 39 (20.7%)          | <b>0.001</b>     |
| Swelling of limbs (lymphoedema)    | <b>109 (19.5%)</b> | 20 (14.3%)   | 89 (21.3%)          | 0.07             | 6 (26.1%)  | 12 (15.4%)        | 2 (5.1%)       | 0.068            | 5 (21.7%)  | 41 (19.8%)         | 43 (22.9%)          | 0.758            |
| Sweats                             | <b>115 (20.6%)</b> | 31 (22.1%)   | 84 (20.1%)          | 0.604            | 11 (47.8%) | 15 (19.2%)        | 5 (12.8%)      | <b>0.004</b>     | 7 (30.4%)  | 51 (24.6%)         | 26 (13.8%)          | <b>0.012</b>     |
| Drowsiness                         | <b>102 (18.3%)</b> | 32 (22.9%)   | 70 (16.7%)          | 0.105            | 13 (56.5%) | 14 (17.9%)        | 5 (12.8%)      | <b>&lt;0.001</b> | 6 (26.1%)  | 42 (20.3%)         | 22 (11.7%)          | <b>0.034</b>     |
| Daytime fatigue                    | <b>266 (47.7%)</b> | 67 (47.9%)   | 199 (47.6%)         | 0.959            | 16 (69.6%) | 42 (53.8%)        | 9 (23.1%)      | <b>0.001</b>     | 18 (78.3%) | 104 (50.2%)        | 77 (41.0%)          | <b>0.002</b>     |
| Something else                     | <b>49 (8.8%)</b>   | 14 (10.0%)   | 35 (8.4%)           | 0.556            | 2 (8.7%)   | 9 (11.5%)         | 3 (7.7%)       | 0.787            | 5 (21.7%)  | 16 (7.7%)          | 14 (7.4%)           | 0.058            |
| Don't know                         | <b>19 (3.4%)</b>   | 2 (1.4%)     | 17 (4.1%)           | 0.136            | 0 (0%)     | 1 (1.3%)          | 1 (2.6%)       | 0.704            | 1 (4.3%)   | 6 (2.9%)           | 10 (5.3%)           | 0.476            |
