# Supplementary material for: Age-related sarcoma patient experience: results from a national survey in England
Source: Springer Nature journal article supplement (doi:10.1186/s12885-018-4866-8), 2018-10-17
Supplement: MOESM3 [file 16206812]

| Supplementary Material: SUPPORT & FOLLOW-UP      |               |              |                     |         |            |                   |                |         |            |                     |                 |         |
|--------------------------------------------------|---------------|--------------|---------------------|---------|------------|-------------------|----------------|---------|------------|---------------------|-----------------|---------|
|                                                  | TOTAL (n=558) | BONE (n=140) | SOFT TISSUE (n=418) | p-value | AYA (n=23) | BONE (n=140)      | Elderly (n=39) | p-value | AYA (n=23) | SOFT TISSUE (n=418) | Elderly (n=188) | p-value |
|                                                  |               |              |                     |         |            | Middle-age (n=78) |                |         |            | Middle-age (n=207)  |                 |         |
| <b>Post-treatment concerns</b>                   |               |              |                     |         |            |                   |                |         |            |                     |                 |         |
| Cancer coming back                               | 398 (71.3%)   | 100 (71.4%)  | 298 (71.3%)         | 0.975   | 21 (91.3%) | 58 (74.4%)        | 21 (53.8%)     | 0.005   | 16 (69.6)  | 158 (76.3%)         | 124 (66.0%)     | 0.074   |
| Coping with side-effects of treatment            | 142 (25.4%)   | 39 (27.9%)   | 103 (24.6%)         | 0.45    | 6 (26.1%)  | 24 (30.8%)        | 9 (23.1%)      | 0.667   | 11 (47.8%) | 61 (29.5%)          | 31 (16.5%)      | <0.001  |
| Coping with disability due to surgery            | 158 (28.3%)   | 69 (49.3%)   | 89 (21.3%)          | <0.001  | 13 (56.5%) | 41 (52.6%)        | 15 (38.5%)     | 0.266   | 9 (39.1%)  | 50 (24.2%)          | 30 (16.0%)      | 0.014   |
| Feeling isolated                                 | 50 (9.0%)     | 11 (7.9%)    | 39 (9.3%)           | 0.597   | 5 (21.7%)  | 5 (6.4%)          | 1 (2.6%)       | 0.02    | 7 (30.4%)  | 28 (13.5%)          | 4 (2.1%)        | <0.001  |
| Worrying about family and friends                | 166 (29.7%)   | 42 (30.0%)   | 124 (29.7%)         | 0.94    | 7 (30.4%)  | 31 (39.7%)        | 4 (10.3%)      | 0.005   | 14 (60.9%) | 75 (36.2%)          | 35 (18.6%)      | <0.001  |
| Loss of control of my life                       | 111 (19.9%)   | 33 (23.6%)   | 78 (18.7%)          | 0.208   | 8 (34.8%)  | 22 (28.2%)        | 3 (7.7%)       | 0.018   | 10 (43.5%) | 53 (25.6%)          | 15 (8.0%)       | <0.001  |
| The possibility of dying                         | 156 (28.0%)   | 40 (28.6%)   | 116 (27.8%)         | 0.852   | 9 (39.1%)  | 26 (33.3%)        | 5 (12.8%)      | 0.032   | 12 (52.2%) | 73 (35.3%)          | 31 (16.5%)      | <0.001  |
| Why I got this cancer                            | 149 (26.7%)   | 35 (25.0%)   | 114 (27.3%)         | 0.599   | 5 (21.7%)  | 23 (29.5%)        | 7 (17.9%)      | 0.367   | 5 (21.7%)  | 61 (29.5%)          | 48 (25.5%)      | 0.564   |
| Spiritual issues                                 | 11 (2.0%)     | 3 (2.1%)     | 8 (1.9%)            | 0.866   | 0 (0%)     | 2 (2.6%)          | 1 (2.6%)       | 0.74    | 2 (8.7%)   | 5 (2.4%)            | 1 (0.5%)        | 0.02    |
| Concerns about money                             | 73 (13.1%)    | 25 (17.9%)   | 48 (11.5%)          | 0.053   | 4 (17.4%)  | 20 (25.6%)        | 1 (2.6%)       | 0.009   | 6 (26.1%)  | 38 (18.4%)          | 4 (2.1%)        | <0.001  |
| Not getting support services                     | 33 (5.9%)     | 11 (7.9%)    | 22 (5.3%)           | 0.26    | 1 (4.3%)   | 9 (11.5%)         | 1 (2.6%)       | 0.186   | 3 (13.0%)  | 18 (8.7%)           | 1 (0.5%)        | <0.001  |
| Something else                                   | 45 (8.1%)     | 10 (7.1%)    | 35 (8.4%)           | 0.644   | 2 (8.7%)   | 5 (6.4%)          | 3 (7.7%)       | 0.921   | 2 (8.7%)   | 16 (7.7%)           | 17 (9.0%)       | 0.894   |
| <b>Clarity of follow-up information</b>          |               |              |                     |         |            |                   |                |         |            |                     |                 |         |
| Clear                                            | 428 (84.9%)   | 115 (86.5%)  | 313 (84.4%)         |         | 20 (90.9%) | 60 (80.0%)        | 35 (97.2%)     |         | 17 (81.0%) | 154 (82.4%)         | 142 (87.1%)     |         |
| Not clear                                        | 63 (12.5%)    | 15 (11.3%)   | 48 (12.9%)          |         | 1 (4.5%)   | 13 (17.3%)        | 1 (2.8%)       |         | 4 (19.0%)  | 27 (14.4%)          | 17 (10.4%)      |         |
| Not given information                            | 8 (1.6%)      | 2 (1.5%)     | 6 (1.6%)            |         | 1 (4.5%)   | 1 (1.3%)          | 0 (0%)         |         | 0 (0%)     | 3 (1.6%)            | 3 (1.8%)        |         |
| Don't know                                       | 5 (1.0%)      | 1 (0.8%)     | 4 (1.1%)            |         | 0 (0.0%)   | 1 (1.3%)          | 0 (0%)         |         | 0 (0%)     | 3 (1.6%)            | 1 (0.6%)        |         |
|                                                  |               |              |                     | 0.944   |            |                   |                | 0.162   |            |                     |                 | 0.756   |
| <b>Aware of how to contact sarcoma team</b>      | 482 (89.6%)   | 123 (88.5%)  | 359 (90.0%)         | 0.621   | 20 (87%)   | 68 (88.3%)        | 35 (89.7%)     | 0.944   | 19 (86.4%) | 179 (89.9%)         | 161 (90.4%)     | 0.834   |
| <b>Sarcoma UK</b>                                |               |              |                     |         |            |                   |                |         |            |                     |                 |         |
| Told about Sarcoma UK                            | 133 (24.3%)   | 34 (24.3%)   | 99 (24.3%)          | 0.912   | 7 (30.4%)  | 21 (26.9%)        | 6 (15.4%)      | 0.327   | 6 (26.1%)  | 57 (28.2%)          | 36 (19.8%)      | 0.262   |
| Given Sarcoma UK toolkit                         | 104 (19.0%)   | 14 (10.1%)   | 90 (22.1%)          | 0.003   | 3 (13.0%)  | 6 (7.8%)          | 5 (12.8%)      | 0.827   | 3 (13.0%)  | 49 (24.1%)          | 38 (21.0%)      | 0.035   |
| <b>Told about local support groups/charities</b> |               |              |                     |         |            |                   |                |         |            |                     |                 |         |
| Generic cancer                                   | 190 (35.8%)   | 44 (32.4%)   | 146 (37.1%)         | 0.514   | 7 (30.4%)  | 23 (30.3%)        | 14 (37.8%)     | 0.832   | 6 (26.1%)  | 78 (39.2%)          | 62 (36.0%)      | 0.244   |
| Sarcoma-specific                                 | 92 (17.5%)    | 21 (15.3%)   | 71 (18.2%)          | 0.561   | 4 (17.4%)  | 12 (15.8%)        | 5 (13.2%)      | 0.597   | 3 (13.0%)  | 40 (20.2%)          | 28 (16.6%)      | 0.321   |
| <b>Websites used</b>                             |               |              |                     |         |            |                   |                |         |            |                     |                 |         |
| Macmillan                                        | 231 (41.4%)   | 61 (43.6%)   | 170 (40.7%)         | 0.546   | 14 (60.9%) | 41 (52.6%)        | 6 (15.4%)      | <0.001  | 17 (73.9%) | 97 (46.9%)          | 56 (29.8%)      | <0.001  |
| Cancer Research UK                               | 108 (22.4%)   | 33 (23.6%)   | 75 (17.9%)          | 0.145   | 9 (39.1%)  | 22 (28.2%)        | 2 (5.1%)       | 0.003   | 10 (43.5%) | 46 (22.2%)          | 19 (10.1%)      | <0.001  |
| Sarcoma UK                                       | 86 (15.4%)    | 20 (14.3%)   | 66 (15.8%)          | 0.67    | 3 (13.0%)  | 16 (20.5%)        | 1 (2.6%)       | 0.032   | 6 (26.1%)  | 38 (18.4%)          | 22 (11.7%)      | 0.073   |
| BCRT                                             | 11 (2.0%)     | 8 (5.7%)     | 3 (0.7%)            | <0.001  | 3 (13.0%)  | 5 (6.4%)          | 0 (0%)         | 0.094   | 1 (4.3%)   | 0 (0%)              | 2 (1.1%)        | 0.048   |
| GIST support UK                                  | 1 (0.2%)      | 0 (0.0%)     | 1 (0.2%)            | 0.562   | 0 (0%)     | 0 (0%)            | 0 (0%)         | n/a     | 0 (0%)     | 1 (0.5%)            | 0 (0%)          | 0.6     |
| Other                                            | 45 (8.1%)     | 9 (6.4%)     | 36 (8.6%)           | 0.411   | 1 (4.3%)   | 6 (7.7%)          | 2 (5.1%)       | 0.786   | 3 (13%)    | 20 (9.7%)           | 13 (6.9%)       | 0.46    |
